# Supplementary material for: Pneumococcal colonization impairs mucosal immune responses to live attenuated influenza vaccine
Source: PubMed Central journal article supplement (PMC7934923; doi:10.1172/jci.insight.141088), 2021-02-22
Supplement: jciinsight-6-141088-s107.pdf [file jciinsight-6-141088-s107.pdf]

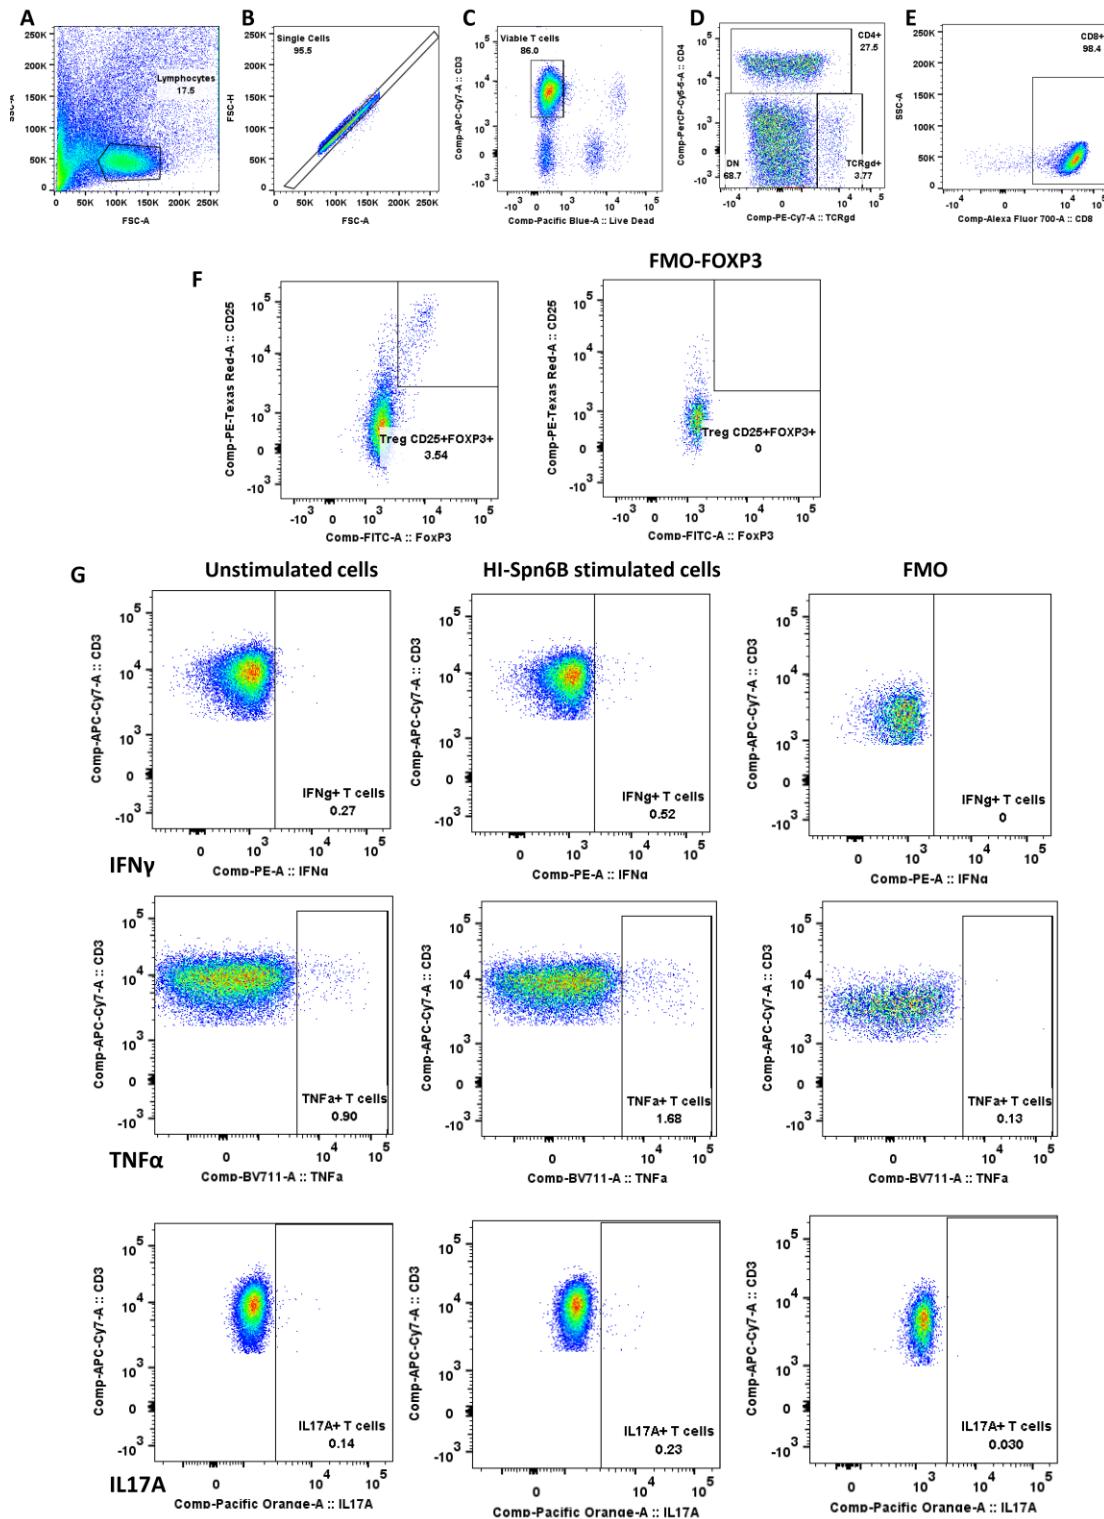

**Supplemental Figure 1. Representative gating strategy to identify T cells and cytokine production by flow cytometry using intracellular staining.** The following gating strategy was used: **(A)** FSC-A/SSC-A to **(B)** FSC-H/FSC-A (in order to exclude doublets) to **(C)** CD3/Viability to **(D)** CD4/TCR- $\gamma\delta$  to **(E)** SSC-A/CD8. **(F)** The markers CD25/FOXP3 (CD25<sup>hi</sup> and FOXP3<sup>+</sup>) were used to assess the frequency of regulatory T cells. To assess cellular production of **(G)** IFN- $\gamma$ , **(H)** IL-17A, **(I)** TNF- $\alpha$ , cells were stained by intracellular staining after overnight mock or influenza-stimulation. Fluorescence Minus One (FMO) controls were used to verify flow cytometric data.

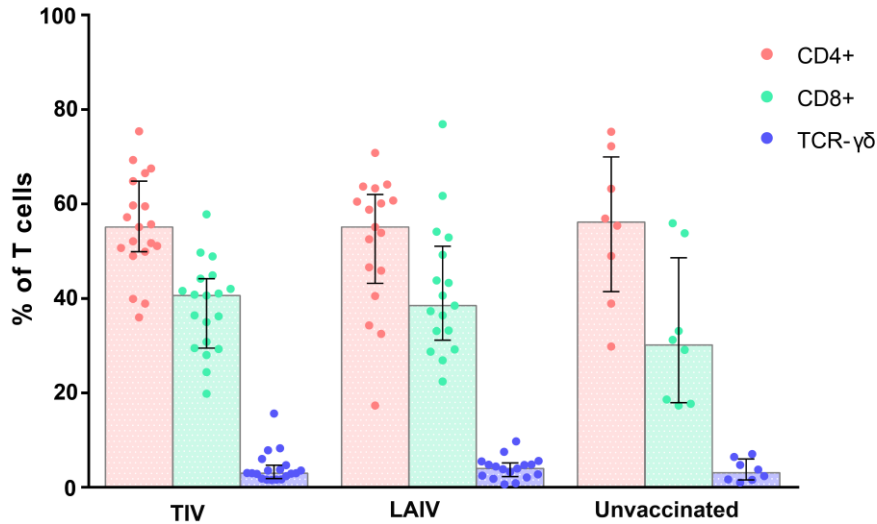

**Supplemental Figure 2. Neither LAIV nor TIV affect frequencies of total CD4<sup>+</sup>, CD8<sup>+</sup> and TCR- $\gamma\delta$  T cell subsets in the lung.** Subset frequencies among viable T cells were measured after an overnight incubation of isolated BAL cells. Bars depict the median proportion of T-cell subsets among total T-cells for TIV/Spn- (n=9), TIV/Spn+ (n=11), LAIV/Spn- (n=11) and LAIV/Spn+ (n=9). Also, unvaccinated Spn- (n=3) and unvaccinated Spn+ (n=5).

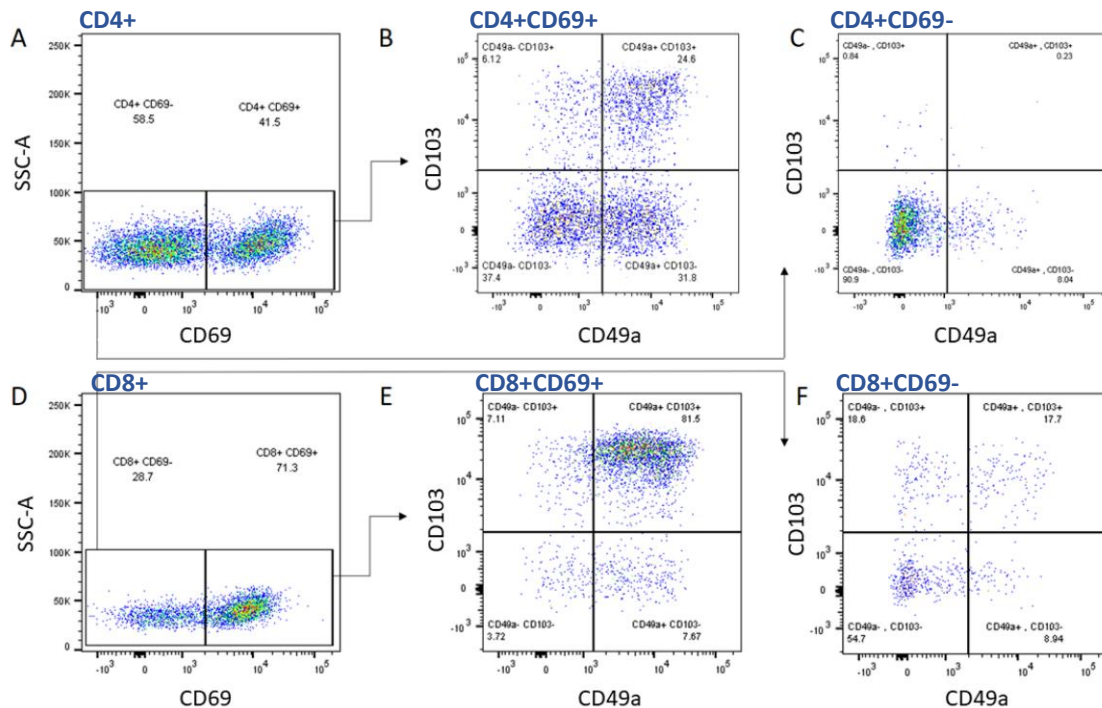

**Supplemental Figure 3. Representative plots of tissue resident memory T-cells identified by flow cytometry.** The markers CD69, CD103 and CD49a were used to assess the frequency of tissue resident memory cells in human BAL. **(A)** CD4<sup>+</sup> T-cells gated into CD69 negative and positive cells. CD103 and CD49 marker expression are shown for **(B)** CD4<sup>+</sup> CD69<sup>+</sup> T cells and **(C)** CD4<sup>+</sup> CD69<sup>-</sup> T cells. **(D)** CD8<sup>+</sup> T cells gated into CD69 negative and positive cells. CD103 and CD49 marker expression are shown for **(E)** CD8<sup>+</sup> CD69<sup>+</sup> T cells and **(F)** CD8<sup>+</sup> CD69<sup>-</sup> T cells.

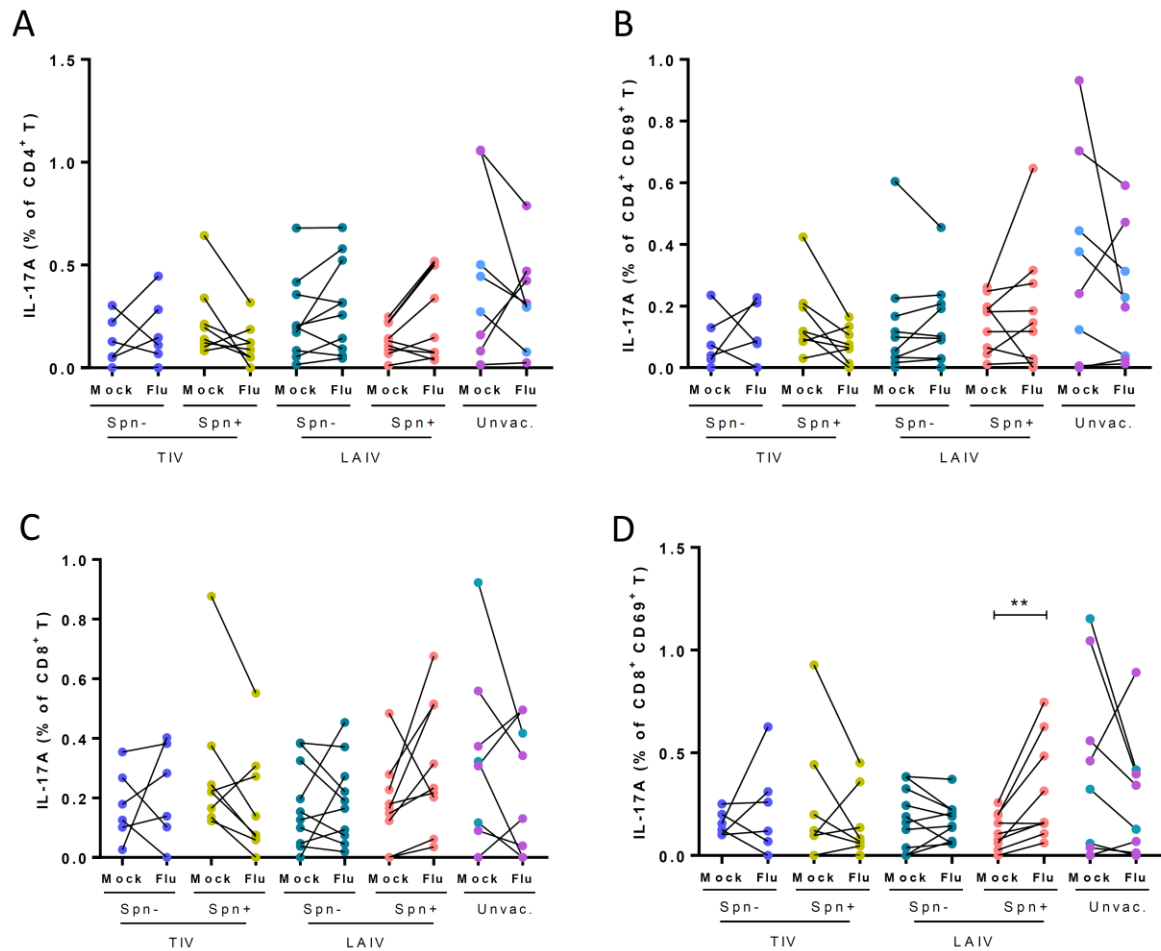

**Supplemental Figure 4. LAIV and TIV do not increase the frequency of influenza-specific, IL-17A-producing T-cells in the lung.** The frequency of cytokine-producing cells was measured by intracellular staining flow cytometry analysis after stimulation with influenza antigens or unstimulated for TIV Spn- (TIV vaccinated/non-colonized, n=8), TIV Spn+ (TIV vaccinated/colonized, n=6), LAIV Spn- (LAIV vaccinated/non-colonized, n=10), LAIV Spn+ (LAIV vaccinated/colonized, n=9), unvaccinated Spn- (n=3), unvaccinated Spn+ (n=5). IL-17A production in **(A)** total CD4<sup>+</sup> T-cells, **(B)** CD4<sup>+</sup> CD69<sup>+</sup> T-cells, **(C)** total CD8<sup>+</sup> T-cells and **(D)** CD8<sup>+</sup> CD69<sup>+</sup> T-cells. Each individual dot represents a single volunteer and the conditions from one individual are connected. \*\*p < 0.01. The unstimulated and influenza antigen-stimulated responses were compared within each group by Wilcoxon test. Influenza-specific responses (influenza-stimulated - unstimulated) were compared between the groups using Mann-Whitney test.

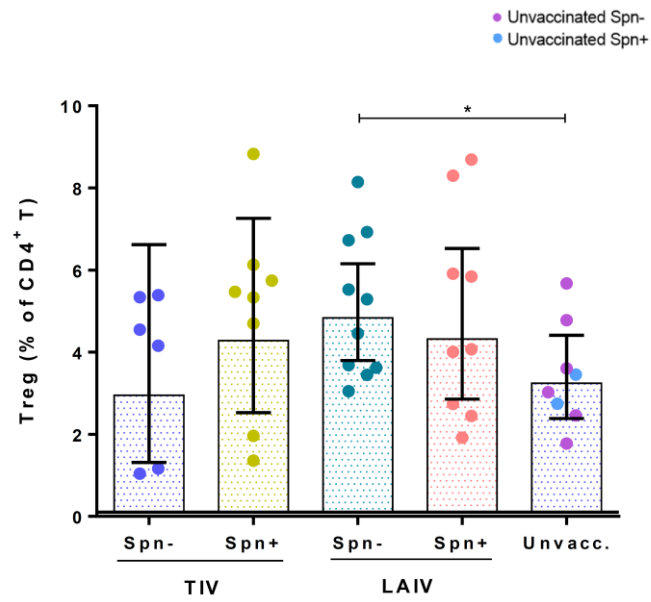

**Supplemental Figure 5. LAIV increases frequency of CD4<sup>+</sup> regulatory T-cells in the lung of Spn non-colonized individuals.** Frequency of unstimulated CD4<sup>+</sup> T-regs (CD3<sup>+</sup> CD4<sup>+</sup> CD25<sup>+</sup> FOXP3<sup>+</sup>) was measured by flow cytometry in human BAL samples from TIV/Spn- (n=6), TIV/Spn- (n=8), LAIV/Spn- (n=10), LAIV/Spn+ (n=9) and unvaccinated (n=8, 3 Spn- and 5 Spn+). Each individual dot represents a single volunteer and geometric means with 95% CI are shown. \*p < 0.05 by unpaired t test.

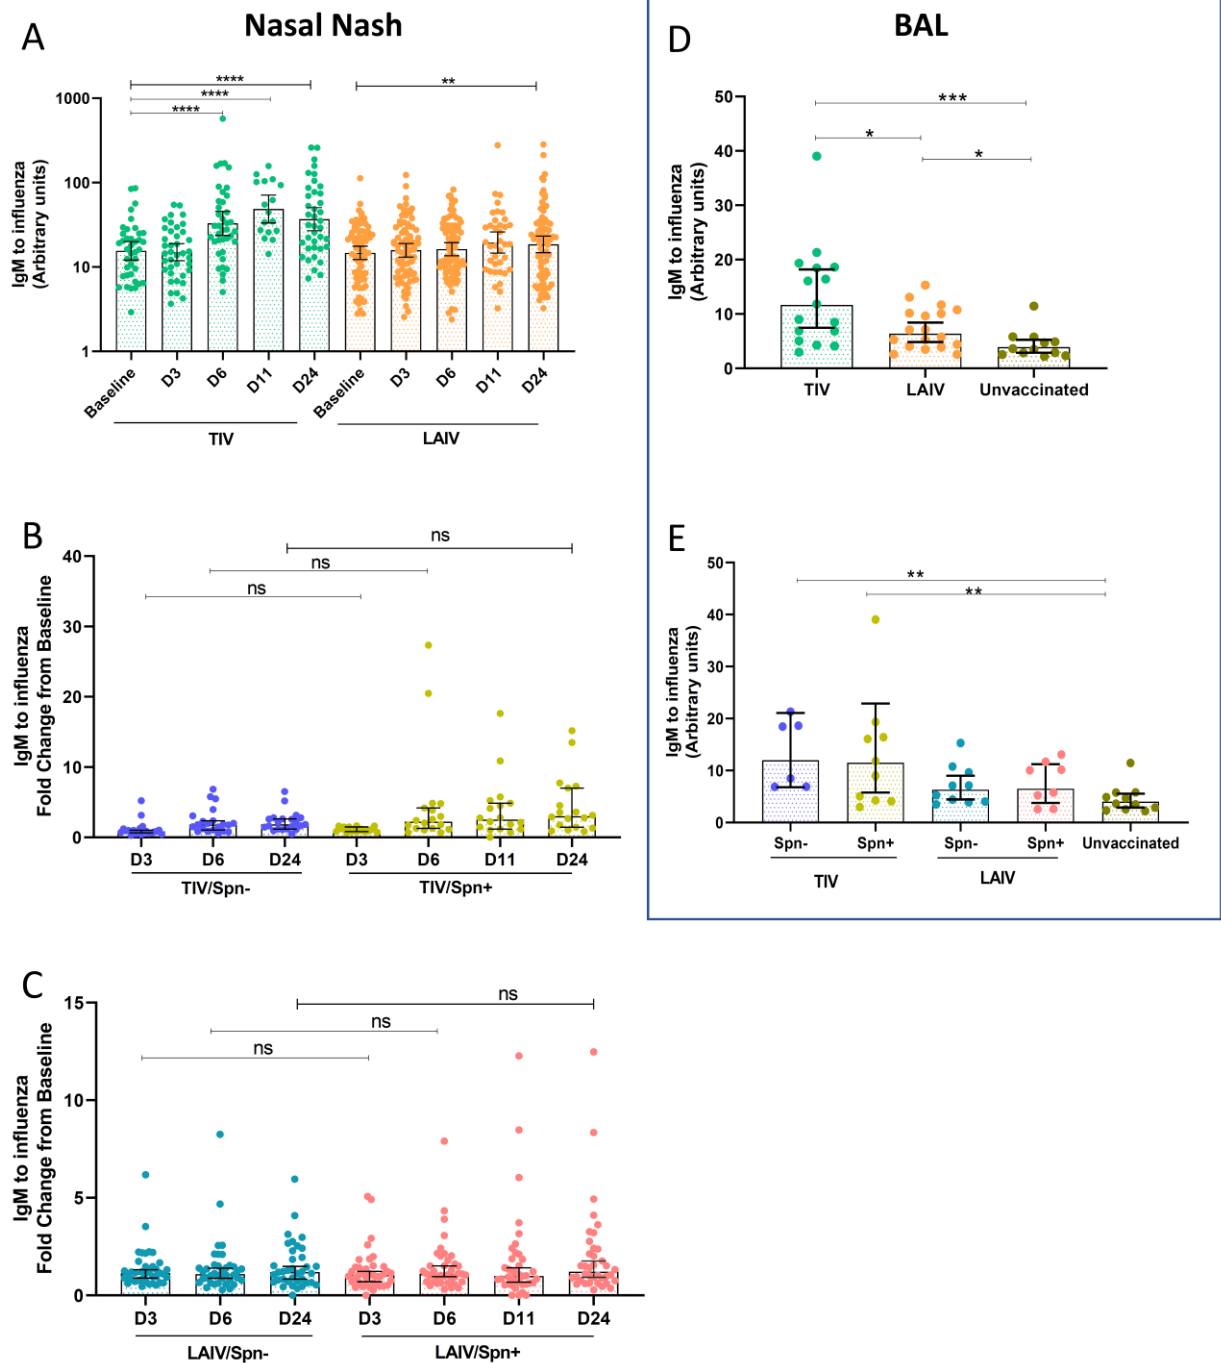

**Supplementary figure 6: TIV induces robust IgM responses at both nasal and lung mucosa. A)** Kinetics of influenza-specific IgM titres measured by ELISA, in nasal wash of TIV ( $n=40$ ) and LAIV ( $n=80$ ) vaccinated subjects at baseline, D3, D6, D11 and D24 post vaccination. **B)** Fold change from baseline of paired IgM titres to influenza at D3, D6, D11 (only Spn+) and D24 in nasal wash of TIV/Spn- ( $n=21$ ) and TIV/Spn+ ( $n=19$ ). **C)** Fold change from baseline of paired IgM titres to influenza at D3, D6, D11 (only Spn+) and D24 in nasal wash of LAIV/Spn- ( $n=37$ ) and LAIV/Spn+ ( $n=43$ ). **D)** Influenza-specific IgM titres in TIV ( $n=20$ ), LAIV ( $n=19$ ) vaccinated subjects and unvaccinated ( $n=12$ ) measured by ELISA in

BAL fluid. **E)** Influenza-specific IgM titres in BAL grouped based on vaccination and colonization status, as TIV/Spn- ( $n=9$ ), TIV/Spn+ ( $n=11$ ), LAIV/Spn- ( $n=11$ ), LAIV/ Spn+ ( $n=8$ ), unvaccinated ( $n=12$ ). Geometric means with 95% CI are shown.\*  $p < 0.05$ , \*\*  $p < 0.01$ , \*\*\* $p < 0.001$  \*\*\*\*  $p < 0.0001$  by Wilcoxon test for comparisons within the same group and by Mann-Whitney test for comparisons between groups.

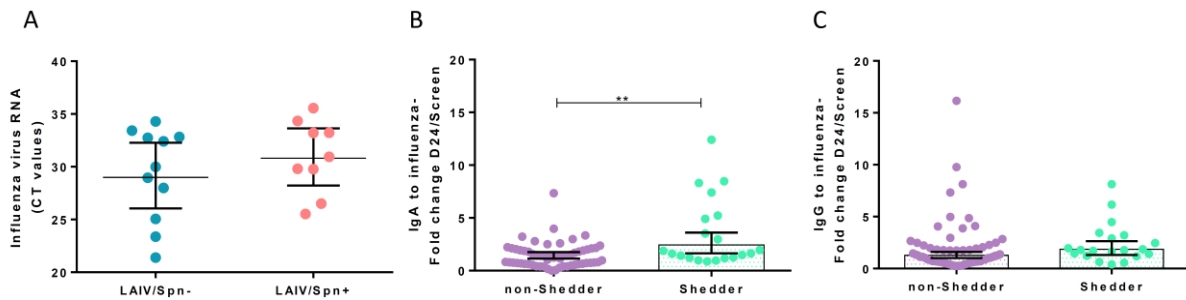

**Supplementary figure 7: Live attenuated influenza virus replication in the nasopharynx elicits influenza virus specific-IgA production in the local mucosa. (A)** Levels of detectable influenza RNA (CT values) 3 days post LAIV administration in both LAIV/Spn- ( $n=11$ ) and LAIV/Spn+ ( $n=9$ ). Fold change (D24/Baseline) of paired (B) IgA and (C) IgG titres to influenza in nasal wash of LAIV vaccinated volunteers. Subjects were grouped in influenza virus non-shedders ( $n=59$ ) or shedders ( $n=20$ ) \*\*  $p < 0.002$  by Mann-Whitney test. Each individual dot represents a single volunteer and geometric means with 95% CI are shown.

| Colonization status | LAIV vaccinated |             |              |
|---------------------|-----------------|-------------|--------------|
|                     | Shedders        |             | Non-Shedders |
|                     | Influenza A     | Influenza B |              |
| Carriage negative   | 3               | 8           | 29           |
| Carriage positive   | 1               | 8           | 30           |
| Percentage          | 5.0%            | 20.3%       | 74.6%        |

**Supplementary Table 1: Influenza virus shedding in the LAIV vaccinated group.** Virus shedding (either influenza A or influenza B strains) was detected in 25.3% (20/79) of the LAIV vaccinated group, by utilizing RNA qPCR on nasal wash samples collected at D3. Colonization status did not affect influenza strains replication in the nasopharynx.  $p > 0.05$  by Fisher's exact test.
